# Supplementary material
Source: PubMed Central journal article supplement (PMC2148285)

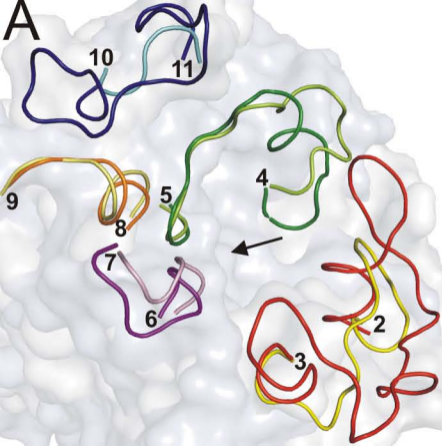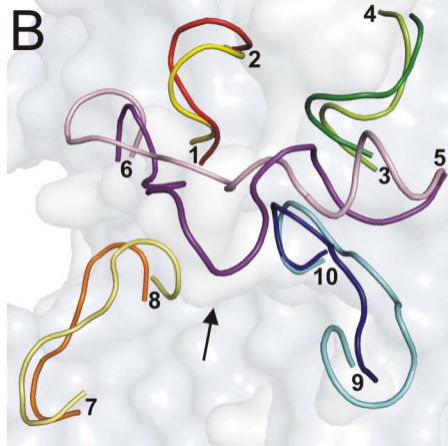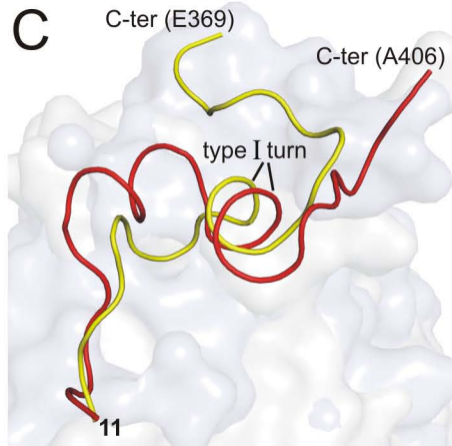

Supplement: pnas_0706563104_1.pdf [file pnas_0706563104_1.pdf]
