# Supplementary material
Source: PubMed Central journal article supplement (PMC2148285)

**A**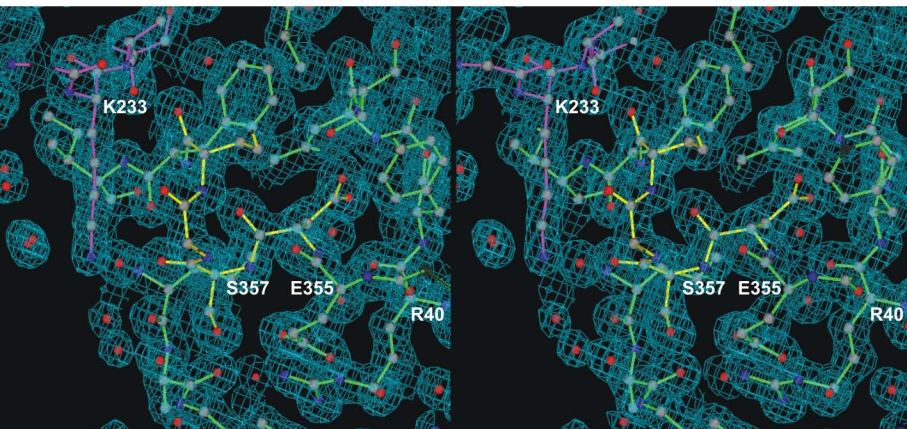**B**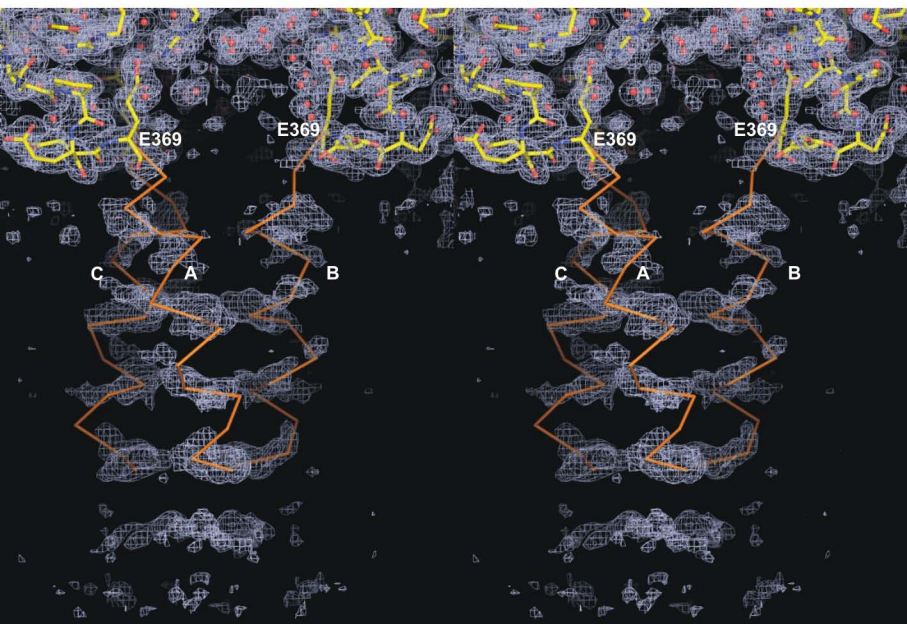

Supplement: pnas_0706563104_2.pdf [file pnas_0706563104_2.pdf]
