# Supplementary material
Source: PubMed Central journal article supplement (PMC2148285)

# Monomer 1

# Monomer 2

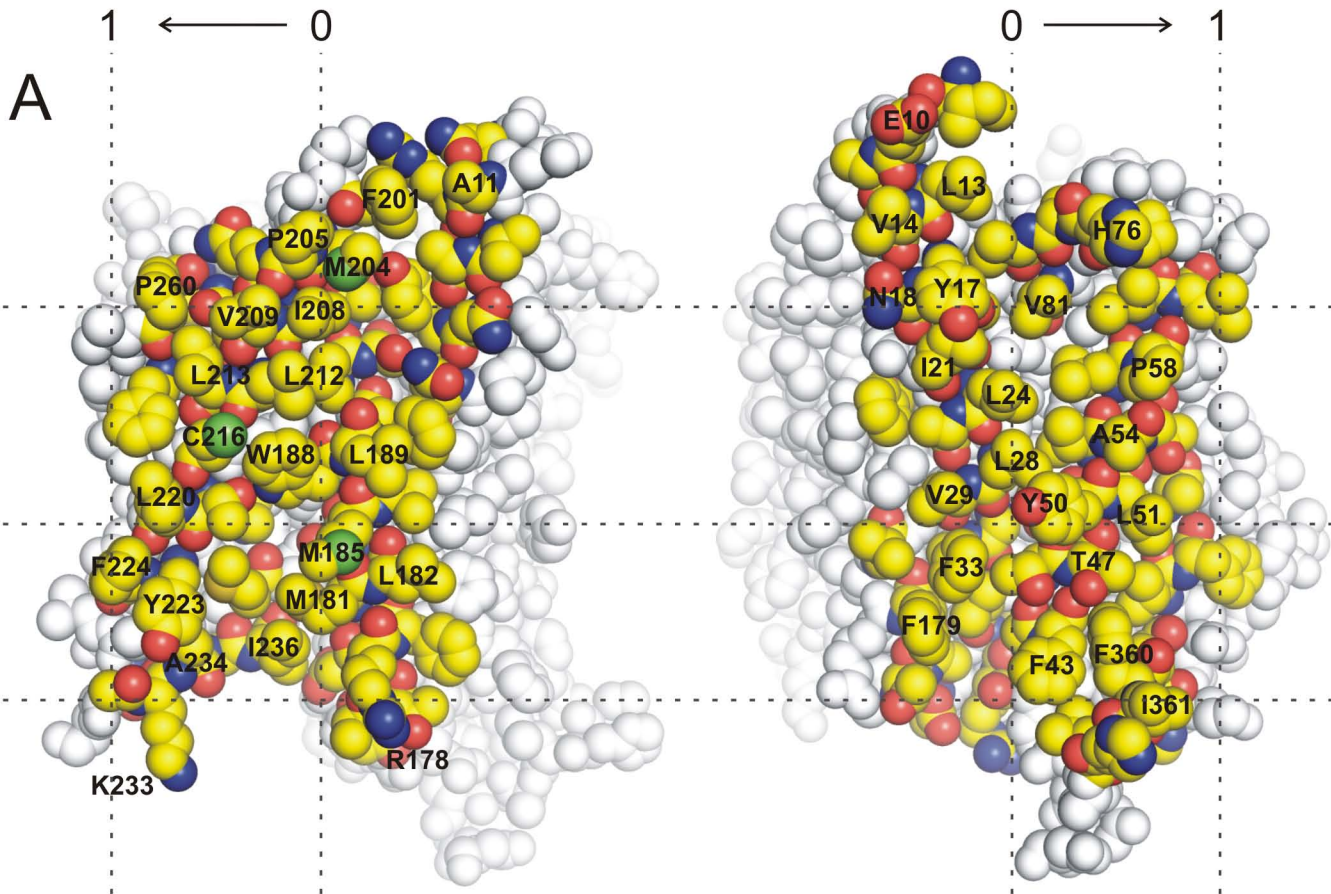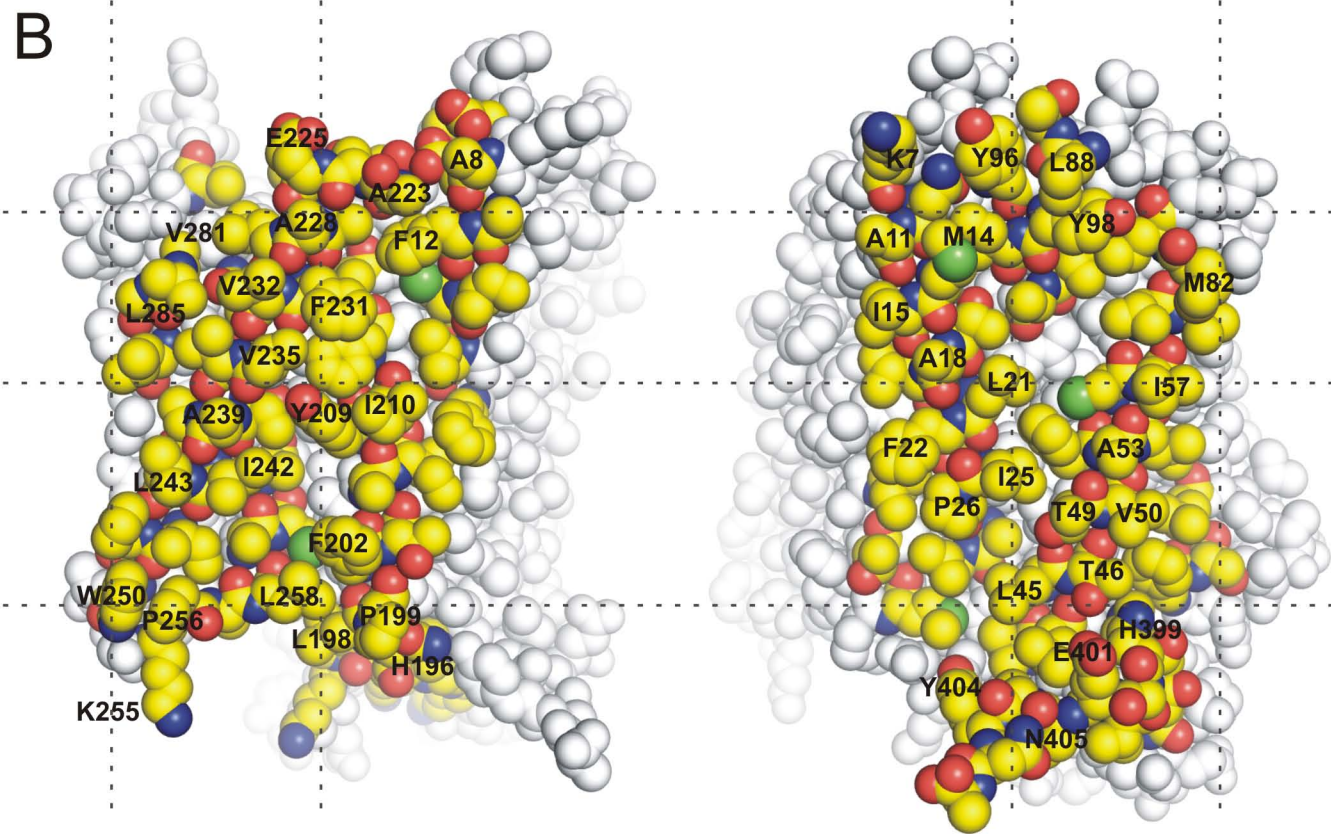

Supplement: pnas_0706563104_3.pdf [file pnas_0706563104_3.pdf]
